# Supplementary material
Source: Springer Nature journal article supplement (https://www.springermedizin.de/resource/supplementary/13550_2013_156_MOESM3_ESM.pdf/9687708)

Total vial sediment activity by Y-90 PET vs dose calibrator

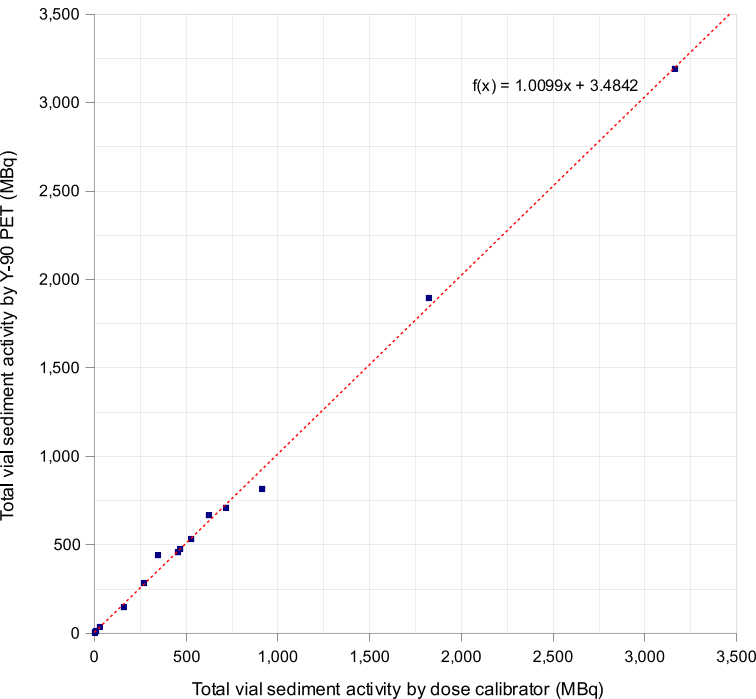

Supplement: MOESM3 [file 9687708]
